# Supplementary material for: NMR spectroelectrochemistry in studies of l-dopa oxidation by graphdiyne/graphene thin films
Source: Royal Society of Chemistry journal article supplement (doi:10.1039/d4ja00465e), 2025-01-01
Supplement: d4ja00465e1.pdf [file d4ja00465e1.pdf]

## Supplementary Information for NMR spectroelectrochemistry in studies of L-dopa oxidation by graphdiyne/graphene thin films

Xiaoping Zhang \*, Lin Yang, Shihui Xu, Zhe Wang, Wei Sun \*

Hainan Engineering Research Center of Tropical Ocean Advanced Optoelectronic Functional Materials, Hainan International Joint Research Center of Marine Advanced Photoelectric Functional Materials, Key Laboratory of Laser Technology and Optoelectronic Functional Materials of Hainan Province, Key Laboratory of Functional Materials and Photoelectrochemistry of Haikou, College of Chemistry and Chemical Engineering, Hainan Normal University, Haikou 571158, P.R. China; yanglin19981223@163.com (L.Y.); xushihui10@163.com (S.X.); 15596056261@163.com (Z.W.);

\* Correspondence: 070911@hainnu.edu.cn(X.Z.); sunwei@hainnu.edu.cn(W.S.); Tel.: +86-130-0390-4760(X.Z.).

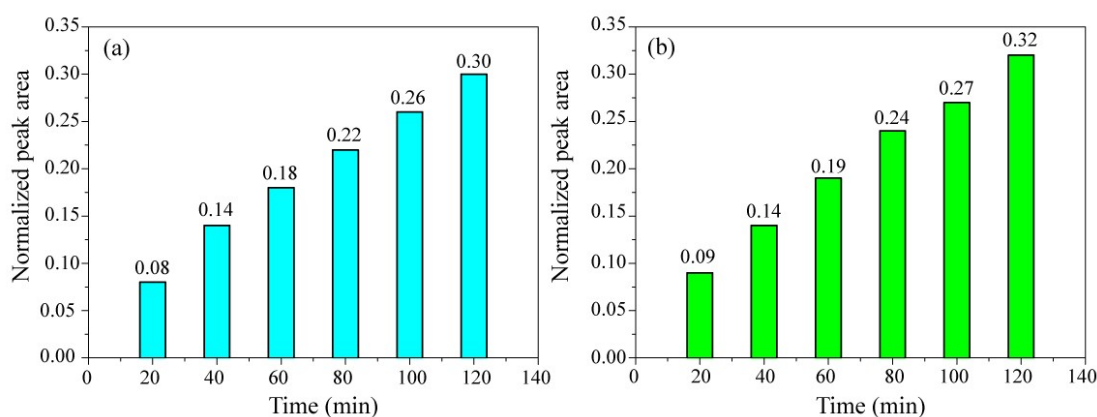

**Figure S1.** Normalized peak areas of the  $^1\text{H}$  NMR spectra for the L-dopa oxidation at 6.1 ppm during electrolysis process in aqueous solution under 900 mV at pH 1 with different electrodes: (a) G/ITO and (b) GDY/G /ITO electrodes. (Standard reference tms normalization 1)

To facilitate the observation of the precipitate formed in the L-dopa solution after the in situ electrochemical nuclear magnetic resonance experiment, we combined the solutions from multiple in situ experiments into a 2-milliliter glass sample vial. Subsequently, we compared it with a freshly prepared L-dopa solution before the experiment. Clearly, the solution after the in situ experiment contained precipitate particles, and due to the small amount of precipitate, the solution appeared grayish-brown. After letting the post-experiment aggregated solution sit for a month, we found that the precipitate particles had further aggregated into a black film-like substance.

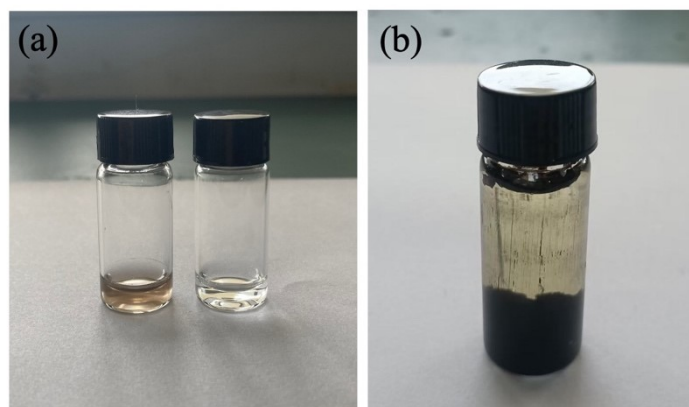

**Figure S2.** (a) Comparison of the L-dopa solution after in situ EC-NMR experiments (left) and the L-dopa solution before the experiments (right), (b) the L-dopa solution after in situ EC-NMR experiments after one month of standing.
